# Supplementary material for: A genome scale metabolic network for rice and accompanying analysis of tryptophan, auxin and serotonin biosynthesis regulation under biotic stress
Source: PubMed Central journal article supplement (PMC4883713; doi:10.1186/1939-8433-6-15), 2013-05-29
Supplement: 12284_2013_52_MOESM8_ESM.pdf [file 12284_2013_52_MOESM8_ESM.pdf]

## Plant Metabolic Pathways

### Search Options

This section in the Gramene databases is home for RiceCyc, MaizeCyc, BrachyCyc and SorghumCyc, the pathway databases for rice, maize, *Brachypodium*, and Sorghum. It also provides mirrors of pathway databases from *Arabidopsis*, tomato, potato, coffee, *Medicago*, *E. coli*, and the MetaCyc and PlantCyc reference databases. In addition to search and browse functions, the database allows users to find genes mapped to respective reactions and pathways and draw intraspecific comparisons between the pathways.

### Pathways Browse and Other Options

Click on the species specific links such as **browse** to go through the list of pathways; **summary** to get a summarized overview. Click on the **more info** link to go to the respective pathway database.

Seek help and tutorials or browse frequently asked questions.

Overlay expression data on the cellular overview

#### RiceCyc ver 3.3

*Oryza sativa japonica*  
Strain: Nipponbare

[Browse](#) | [Summary](#) | [More info](#)

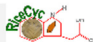

#### AraCyc\* ver 8.0

*Arabidopsis thaliana*  
Strain: Columbia

[Browse](#) | [Summary](#) | [More info](#)

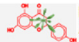

#### EcoCyc\* ver 15.0

*Escherichia coli*  
Strain: K-12 MG1655

[Browse](#) | [Summary](#) | [More info](#)

#### SorghumCyc ver 1.1

*Sorghum bicolor*  
Strain: BTx623

[Browse](#) | [Summary](#) | [More info](#)

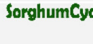

#### MediCyc\* ver 1.0.1

*Medicago truncatula*, Barrelclover  
Strain: n/a

[Browse](#) | [Summary](#) | [More info](#)

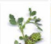

#### MetaCyc\* ver 15.0

Reference Pathway Database  
Strain: not applicable

[Browse](#) | [Summary](#) | [More info](#)

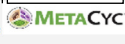

#### MaizeCyc ver 2.0.2

*Zea mays*  
Strain: B73

[Browse](#) | [Summary](#) | [More info](#)

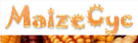

#### PoplarCyc\* ver 3.0

*Populus trichocarpa* (and other *Populus* species and hybrids)  
Strain: n/a

[Browse](#) | [Summary](#) | [More info](#)

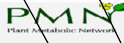

#### PlantCyc\* ver 5.0

Plant Metabolic Pathway Database  
Strain: not applicable

[Browse](#) | [Summary](#) | [More info](#)

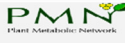

#### BrachyCyc ver 2.0

*Brachypodium distachyon*  
Strain: Bd21

[Browse](#) | [Summary](#) | [More info](#)

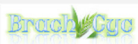

#### PotatoCyc\* ver 1.0.1.1

*Solanum tuberosum*, Potato  
Strain: n/a

[Browse](#) | [Summary](#) | [More info](#)

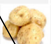

Download to get a stand alone copy of the RiceCyc database

Links to summary overviews and detail information

#### CoffeaCyc\* ver 1.1.1

*Coffea canephora*, Coffee  
Strain: n/a

[Browse](#) | [Summary](#) | [More info](#)

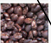

A tool to validate the microarray probe IDs and their mapping to gene locus IDs

#### LycCyc\* ver 2.0.1.1

*Solanum lycopersicum*, Tomato  
Strain: n/a

[Browse](#) | [Summary](#) | [More info](#)

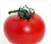

\* Mirror database. Not curated by the Gramene database. Click on **more info** link for details.
