# Supplementary material for: A genome scale metabolic network for rice and accompanying analysis of tryptophan, auxin and serotonin biosynthesis regulation under biotic stress
Source: PubMed Central journal article supplement (PMC4883713; doi:10.1186/1939-8433-6-15), 2013-05-29

**(A)** *Oryza sativa* subsp. Japonica Group cultivar Nipponbare Pathway: tryptophan biosynthesis

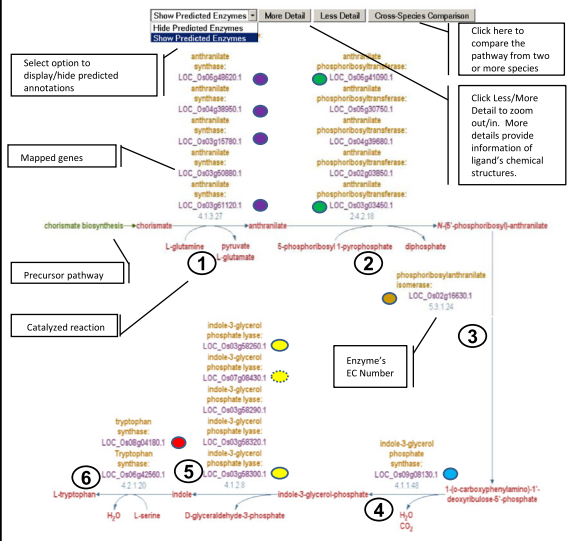

**(D)**

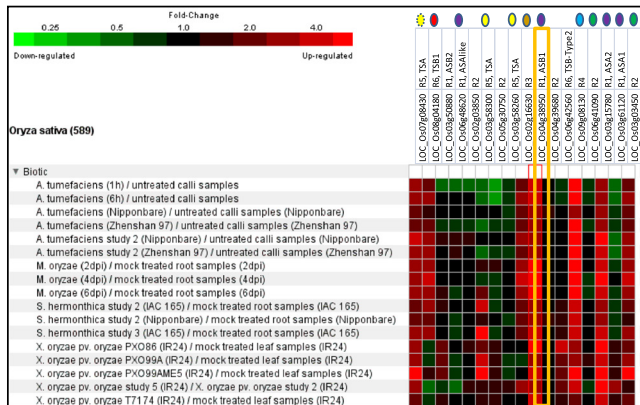

**(B)**

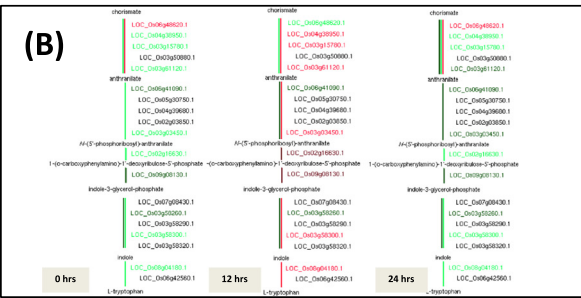

**(C)**

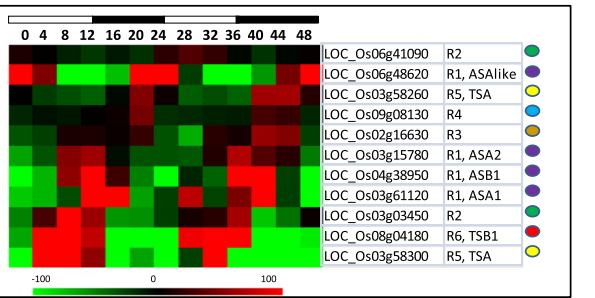

Supplement: 12284_2013_52_MOESM9_ESM.pdf [file 12284_2013_52_MOESM9_ESM.pdf]
