# Supplementary material for: A genome scale metabolic network for rice and accompanying analysis of tryptophan, auxin and serotonin biosynthesis regulation under biotic stress
Source: PubMed Central journal article supplement (PMC4883713; doi:10.1186/1939-8433-6-15), 2013-05-29

**(A)**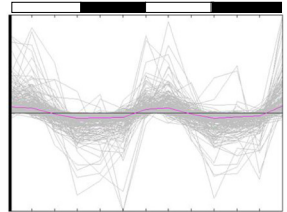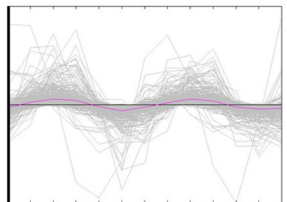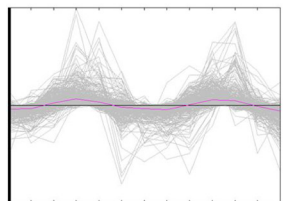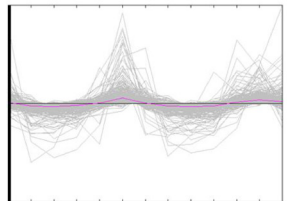

0 4 8 12 16 20 24 28 32 36 40 44 48

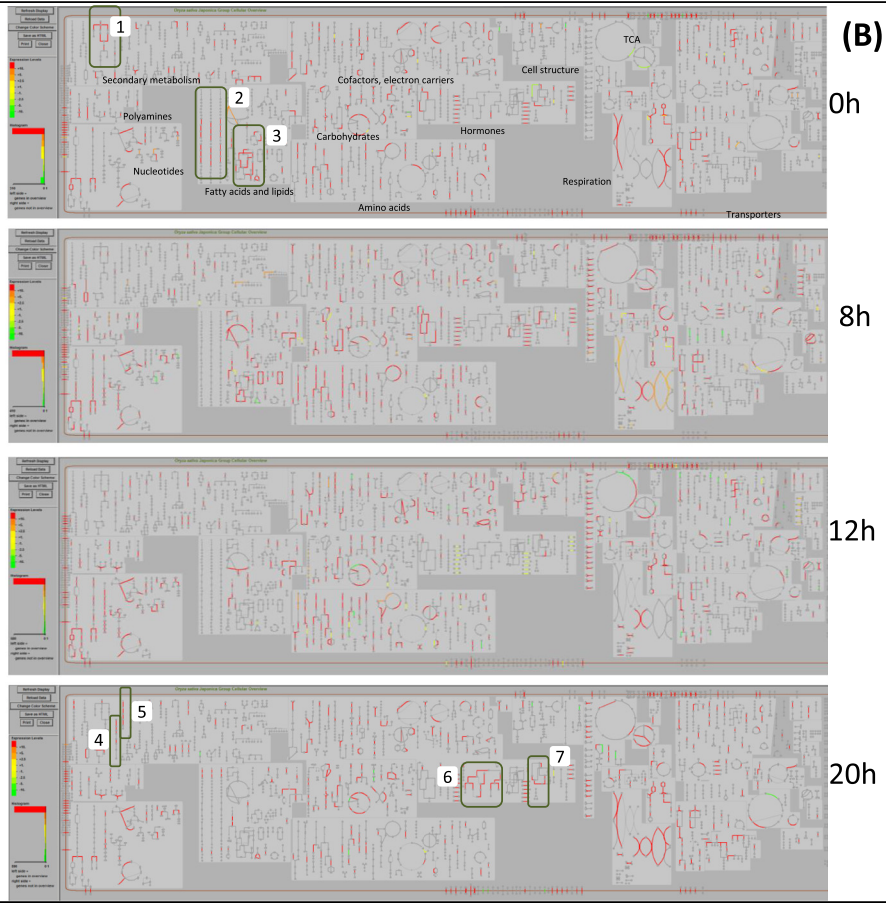

Supplement: 12284_2013_52_MOESM10_ESM.pdf [file 12284_2013_52_MOESM10_ESM.pdf]
